# Supplementary material for: Reliability of the Freehand Region-of-Interest Method in Quantitative Cerebral Diffusion Tensor Imaging
Source: Research Square preprint supplement (doi:10.21203/rs.3.rs-140421/v1), 2021-02-08
Supplement: Supplementary file 1 [file 4675941e8aff0703a82a8dd8.xlsx]

## Sheet: Table 3
		Obs. 1	Obs. 2	Obs. 1	Obs. 2	Obs.1 and Obs. 2
Region		Mean ± SD	Mean ± SD	CV(%)	CV(%)	Mean diff ± 2sd
Cerebral peduncle	FA	0.819 ± 0.043	0.818 ± 0.033	5.3	4.1	0.001 ± 0.098
	ADC	0.728 ± 0.047	0.721 ± 0.051	6.4	7.1	0.007 ± 0.168
	AD	1.653 ± 0.135	1.632 ± 0.113	8.2	6.9	0.021 ± 0.362
	RD	0.266 ± 0.050	0.270 ± 0.048	18.9	17.7	-0.005 ± 0.152
Internal capsule	FA	0.718 ± 0.028	0.719 ± 0.040	3.9	5.6	-0.001 ± 0.098
(posterior)	ADC	0.703 ± 0.025	0.711 ± 0.028	3.5	4.0	-0.007 ± 0.099
	AD	1.411 ± 0.060	1.435 ± 0.064	4.3	4.5	-0.024 ± 0.195
	RD	0.348 ± 0.027	0.346 ± 0.040	7.9	11.5	0.002 ± 0.106
Corona radiata	FA	0.532 ± 0.045	0.522 ± 0.050	8.4	9.6	0.010 ± 0.111
	ADC	0.679 ± 0.033	0.686 ± 0.043	4.8	6.3	-0.007 ± 0.117
	AD	1.104 ± 0.052	1.108 ± 0.055	4.7	5.0	-0.004 ± 0.170
	RD	0.467 ± 0.044	0.477 ± 0.056	9.5	11.7	-0.010 ± 0.136
Centrum semiovale	FA	0.573 ± 0.081	0.579 ± 0.054	14.2	9.3	-0.001 ± 0.152
	ADC	0.714 ± 0.029	0.708 ± 0.035	4.0	4.9	0.005 ± 0.094
	AD	1.234 ± 0.084	1.299 ± 0.046	6.8	3.7	0.011 ± 0.187
	RD	0.454 ± 0.065	0.447 ± 0.051	14.3	11.3	0.002 ± 0.137
Uncinate fasciculus	FA	0.573 ± 0.070	0.562 ± 0.054	12.3	9.6	0.011 ± 0.167
	ADC	0.789 ± 0.047	0.786 ± 0.041	5.9	5.2	0.003 ± 0.130
	AD	1.372 ± 0.086	1.348 ± 0.065	6.3	4.9	0.024 ± 0.190
	RD	0.497 ± 0.069	0.505 ± 0.057	13.9	11.3	-0.007 ± 0.179
Forceps minor	FA	0.515 ± 0.077	0.494 ± 0.069	14.9	14	0.020 ± 0.207
	ADC	0.768 ± 0.033	0.771 ± 0.044	4.3	5.7	-0.003 ± 0.120
	AD	1.256 ± 0.073	1.234 ± 0.063	5.8	5.1	0.022 ± 0.205
	RD	0.525 ± 0.067	0.539 ± 0.066	12.8	12.3	-0.015 ± 0.191
Thalamus	FA	0.325 ± 0.031	0.315 ± 0.027	9.7	8.5	0.009 ± 0.101
	ADC	0.750 ± 0.025	0.750 ± 0.028	3.3	3.8	0.000 ± 0.083
	AD	1.002 ± 0.029	0.992 ± 0.024	2.9	2.5	0.009 ± 0.065
	RD	0.625 ± 0.032	0.629 ± 0.033	5.1	5.3	-0.004 ± 0.109
CC Genu	FA	0.869 ± 0.042	0.849 ± 0.057	4.9	6.7	0.020 ± 0.154
	ADC	0.745 ± 0.050	0.760 ± 0.055	6.7	7.2	-0.015 ± 0.159
	AD	1.811 ± 0.088	1.799 ± 0.109	4.8	6.0	0.013 ± 0.259
	RD	0.211 ± 0.064	0.240 ± 0.081	30.1	33.7	-0.005 ± 0.247
CC Splenium	FA	0.862 ± 0.051	0.862 ± 0.054	5.9	6.2	0.000 ± 0.169
	ADC	0.720 ± 0.052	0.749 ± 0.053	7.2	6.2	-0.030 ± 0.163
	AD	1.744 ± 0.134	1.805 ± 0.112	7.7	6.2	-0.061 ± 0.295
	RD	0.213 ± 0.066	0.222 ± 0.076	30.7	34.4	-0.008 ± 0.236
FA, fractional anisotropy; ADC, apparent diffusion coefficient; AD, axial diffusivity; RD, radial diffusivity
ICC, intraclass correlation coefficient; CV, coefficient of variation; CC, corpus callosum
