# Supplementary material for: Reliability of the Freehand Region-of-Interest Method in Quantitative Cerebral Diffusion Tensor Imaging
Source: Research Square preprint supplement (doi:10.21203/rs.3.rs-140421/v1), 2021-02-08
Supplement: Supplementary file 2 [file 87f333fbab9232d8f5dddaba.xlsx]

## Sheet: Table 2
		1st meas.	2nd meas.	1st meas.	2nd meas.	Average	Single	1st and 2st meas.
Region		Mean ± sd	Mean ± sd	CV(%)	CV(%)	ICC	ICC	Mean diff ± 2sd
Cerebral peduncle	FA	0.808 ± 0.041	0.804 ± 0.044	5.0	5.5	0.748	0.597	0.004 ± 0.077
	ADC	0.727 ± 0.045a	0.725 ± 0.051	6.2	7.0	0.801	0.668	0.002 ± 0.079
	AD	1.625 ± 0.106b	1.614 ± 0.122	6.5	7.6	0.859	0.752	0.010 ± 0.161
	RD	0.278 ± 0.051	0.280 ± 0.053	18.3	19.0	0.756	0.608	-0.003 ± 0.093
Internal capsule	FA	0.699 ± 0.033c	0.689 ± 0.037	4.7	5.3	0.859	0.752	0.010 ± 0.046
(posterior)	ADC	0.706 ± 0.021d	0.702 ± 0.021	3.0	3.0	0.949	0.903	0.003 ± 0.018
	AD	1.388 ± 0.053	1.371 ± 0.055	3.8	4.0	0.877	0.781	0.018 ± 0.065
	RD	0.364 ± 0.030e	0.368 ± 0.034	8.2	9.2	0.912	0.839	-0.004 ± 0.036
Corona radiata	FA	0.502 ± 0.049f	0.491 ± 0.047	9.7	9.6	0.867	0.766	0.011 ± 0.063
	ADC	0.700 ± 0.035g	0.708 ± 0.034	5.0	4.8	0.936	0.880	-0.008 ± 0.030
	AD	1.104 ± 0.050	1.105 ± 0.048	4.5	4.3	0.848	0.736	-0.001 ± 0.071
	RD	0.498 ± 0.048h	0.510 ± 0.050	9.7	9.8	0.917	0.846	-0.012 ± 0.051
Centrum semiovale	FA	0.542 ± 0.067	0.549 ± 0.060	12.3	11	0.894	0.809	-0.007 ± 0.078
	ADC	0.724 ± 0.030i	0.724 ± 0.029	4.2	4.0	0.976	0.953	0.000 ± 0.018
	AD	1.210 ± 0.066	1.217 ± 0.049	5.5	4.0	0.764	0.618	-0.008 ± 0.102
	RD	0.481 ± 0.056	0.477 ± 0.052	11.7	11	0.938	0.882	0.004 ± 0.053
Uncinate fasciculus	FA	0.566 ± 0.060*j	0.566 ± 0.056	10.6	9.9	0.945*	0.895	-0.001 ± 0.054
	ADC	0.784 ± 0.042*	0.785 ± 0.041	5.3	5.3	0.954*	0.912	-0.001 ± 0.035
	AD	1.351 ± 0.078	1.355 ± 0.063	5.8	4.6	0.882	0.789	-0.004 ± 0.093
	RD	0.500 ± 0.053	0.500 ± 0.059	10.5	11.8	0.963	0.929	0.000 ± 0.045
Forceps minor	FA	0.505 ± 0.058*k	0.505 ± 0.054	11.5	10.6	0.933*	0.874	0.001 ± 0.057
	ADC	0.771 ± 0.033*	0.768 ± 0.034	4.3	4.5	0.940*	0.887	0.003 ± 0.032
	AD	1.246 ± 0.071	1.240 ± 0.063	5.7	5.0	0.893	0.807	0.006 ± 0.084
	RD	0.533 ± 0.044	0.530 ± 0.053	8.3	10	0.946	0.897	0.003 ± 0.048
Thalamus	FA	0.316 ± 0.026*	0.311 ± 0.028	8.3	9.2	0.862*	0.758	0.005 ± 0.037
	ADC	0.758 ± 0.027*	0.760 ± 0.027	3.5	3.5	0.960*	0.924	-0.001 ± 0.021
	AD	1.004 ± 0.033	1.001 ± 0.035	3.2	3.5	0.914	0.842	0.003 ± 0.038
	RD	0.635 ± 0.032	0.640 ± 0.029	5.0	4.5	0.917	0.847	-0.004 ± 0.032
CC Genu	FA	0.861 ± 0.040	0.864 ± 0.045	4.6	5.3	0.855	0.747	-0.002 ± 0.061
	ADC	0.757 ± 0.045	0.759 ± 0.047	6.0	6.2	0.829	0.708	-0.001 ± 0.071
	AD	1.822 ± 0.100	1.831 ± 0.101	5.5	5.5	0.886	0.796	-0.010 ± 0.129
	RD	0.225 ± 0.057	0.222 ± 0.064	25.4	28.7	0.857	0.750	0.003 ± 0.086
CC Splenium	FA	0.853 ± 0.043	0.847 ± 0.041	5.0	4.8	0.877	0.781	0.006 ± 0.055
	ADC	0.741 ± 0.057	0.748 ± 0.062	7.8	8.3	0.921	0.854	-0.007 ± 0.064
	AD	1.768 ± 0.131	1.766 ± 0.138	7.4	7.8	0.942	0.891	0.001 ± 0.127
	RD	0.230 ± 0.060	0.238 ± 0.058	26.1	24.4	0.861	0.756	-0.009 ± 0.082
FA, fractional anisotropy; ADC, apparent diffusion coefficient; AD, axial diffusivity; RD, radial diffusivity;
ICC, intraclass correlation coefficient; CV, coefficient of variation; CC, corpus callosum
Regions with significant differences between right (R) and left (L) cerebral hemispheres (p < 0.007):
a,b Cerebral peduncle a) ADC: R 0.746 ± 0.062, L 0.707 ± 0.060 b) AD: R 1.660 ± 0.138 L 1.592 ± 0.122;
c,d,e Posterior limb of the Internal capsule: c) FA: R 0.693 ± 0.037, L 0.707 ± 0.036 d) ADC: R 0.713 ± 0.025, L 0.698 ± 0.024
e) RD: R 0.373 ± 0.037, L 0.355 ± 0.031; f,g,h Corona radiata: f) FA: R 0.693 ± 0.037, L 0.707 ± 0.036
g) ADC: R 0.713 ± 0.025, L 0.698 ± 0.024 h) RD: R 0.373 ± 0.037, L 0.355 ± 0.031
i Centrum Semiovale i) ADC: R 0.731 ± 0.034, L 0.717 ± 0.032, j Uncinate fasciculus j) FA: R 0.575 ± 0.062, L 0.556 ± 0.064
k Forceps minor k) FA: R 0.519 ± 0.070, L 0.491 ± 0.058.
* Also published in our previous study Nenonen et al. 2015 (41). That study tabulated the right and left hemispheres separately.
						n
