# Supplementary material for: Reliability of the Freehand Region-of-Interest Method in Quantitative Cerebral Diffusion Tensor Imaging
Source: Research Square preprint supplement (doi:10.21203/rs.3.rs-140421/v1), 2021-02-08
Supplement: Supplementary file 3 [file c9a7a849c27c424891216297.xlsx]

## Sheet: Table 1
Region		Geometric distortion	Air-cavity	Fat mis-registration
Cerebral peduncle	right	17.5 %	0.65
	left	10.0 %	0.5
Internal capsule (post)	right	-	-	7.5 %
	left	-	-	7.5 %
Corona radiata	right	-	-	0
	left	-	-	0.55
Centrum semiovale	right	-	-	5.0 %
	left	-	-	0.25
